# Supplementary material for: Probing the nature of active chromium species and promotional effects of potassium in Cr/MCM-41 catalysts for methyl mercaptan abatement
Source: Royal Society of Chemistry journal article supplement (doi:10.1039/c9nj02858g), 2019-01-01
Supplement: c9nj02858g1.pdf [file c9nj02858g1.pdf]

## Electronic Supplementary Information

### **Probing promotional effects of potassium and the nature of active chromium species in Cr/MCM-41 catalysts for methyl mercaptan abatement**

Yutong Zhao<sup>a</sup>, Jichang Lu<sup>a</sup>, Dingkai Chen<sup>a</sup>, Liming Zhang<sup>a</sup>, Sufang He<sup>b</sup>, Caiyun Han<sup>a</sup>,  
Dedong He<sup>\*c</sup>, Yongming Luo<sup>\*a</sup>

<sup>a</sup> Faculty of Environmental Science and Engineering, Kunming University of Science and Technology, Kunming 650500, PR China.

<sup>b</sup> Research Center for Analysis and Measurement, Kunming University of Science and Technology, Kunming, 650093, PR China.

<sup>c</sup> Faculty of Chemical Engineering, Kunming University of Science and Technology, Kunming 650500, PR China.

\* Corresponding author

Tel: +86-871-65103845

Fax: +86-871-65103845

E-mail: [dedong.he@qq.com](mailto:dedong.he@qq.com);

[environcatalysis222@yahoo.com](mailto:environcatalysis222@yahoo.com)

## 2 Experimental

### 2.1 Synthesis of support and catalysts

MCM-41 was synthesized via hydrothermal method by employing tetraethyl orthosilicate (TEOS) as silicon source and cetyltrimethyl ammonium bromide (CTAB) as the template. Ammonium solution ( $\text{NH}_4\text{OH}$ ) was used to adjust the pH of synthesis solution. In a typical synthesis batch, 14 g of CTAB and 54 mL of  $\text{NH}_4\text{OH}$  were dissolved into 635 mL of deionized water under ambient temperature. Next to, 57.6 mL of TEOS was introduced by dripping in the above mixture solution under continuous stirring. Subsequently, the white solid was obtained after filtrated and dried 110 °C for 24 h. Finally, the sample was calcined under 550 °C for 5 h.

MCM-41 supported Cr-based catalysts were prepared via incipient wetness impregnation route, and the corresponding procedures were registered as follows: the calculated amount of Cr precursors ( $\text{H}_8\text{CrN}_2\text{O}_4$ ,  $\text{K}_2\text{Cr}_2\text{O}_7$  and  $\text{K}_2\text{CrO}_4$ ) was added to hot deionized water to ensure that the precursor was completely dissolved so as to keep the same loading of Cr. Next to, 2 g of MCM-41 was rapidly added into the above mixture solution so as to make all the liquid to be totally adsorbed by MCM-41. Almost immediately, the resulted sample was placed under ambient temperature for one night, then dried at 110 °C for 6h. Finally, the dried material was calcined under 550 °C for 5h in air. The corresponding samples prepared with  $\text{H}_8\text{CrN}_2\text{O}_4$ ,  $\text{K}_2\text{Cr}_2\text{O}_7$  and  $\text{K}_2\text{CrO}_4$  were denoted as Cr-N/MCM-41, Cr-K/MCM-41 and Cr- $\text{K}_2$ /MCM-41, respectively.

To investigate and understand the roles of K addition, two other materials were also synthesized by using incipient wetness impregnation. The first one was named as K/MCM-41 that was prepared according to the above synthesis procedures by replacing Cr precursor with  $\text{K}_2\text{CO}_3$ . The second one was labelled as Cr-N-K/MCM-41, in which Cr-N/MCM-41 rather than MCM-41 was impregnated with  $\text{K}_2\text{CO}_3$ , and the mole ratio of Cr to K was kept at 1.0 (Cr/K = 1.0). Moreover, to determine the optimum Cr content and K content on active Cr-N-K/MCM-41 sample, the different mole ratio of xCr-N-yK/MCM-41 catalysts (x=0.5, y=1; x=1.5, y=1; x=1, y=0.5; x=1, y=1.5) were also prepared at Cr/K = 0.5, 1.5 and K/Cr=0.5, 1.5 by using incipient wetness impregnation.

The mechanically mixed catalysts (i.e.  $\text{CrO}_3$ /MCM-41,  $\text{Cr}_2\text{O}_3$ /MCM-41 and  $\text{CrO}_3+\text{Cr}_2\text{O}_3$ /MCM-41) containing 18 wt % Cr loading were synthesized.  $\text{CrO}_3+\text{Cr}_2\text{O}_3$ /MCM-41 catalyst was prepared by mixing equal masses of each component by means of grinding. Then, the obtained catalyst followed by calcination at 300 °C for 5h in  $\text{N}_2$ .

### 2.2 Catalyst characterization

X-ray diffraction (XRD) patterns of catalyst samples were recorded on a Rigaku D/max - 1200 diffractometer by using Cu K $\alpha$  radiation ( $\lambda=1.5406 \text{ \AA}$ ) within the scattering angle ( $2\theta$ ) range of 20-80°. The spectra of Ultraviolet-visible (UV-vis) diffuse reflectance were obtained from a PERSEE TU-1901 and tested in the region of 250-800 nm at room temperature. X-ray photoelectron spectroscopy (XPS) was implemented on a PHI 5000 Versa Probe II spectrometer by using non-monochromatic Al K $\alpha$  radiation (1486.6 eV) as X-ray source and photoelectron peak of C1s (284.6 eV) was employed to adjust binding energy for reference. Thermogravimetric (TG) analysis was carried out on a Mettler-Toledo TGA/DSC (STA449F3) instrument, and the sample was heated from 50 to 800 °C (10 °C/min) within nitrogen ( $\text{N}_2$ ) flow. Chromium and potassium content of the samples were determined by ICP-OES.

The profiles of temperature-programmed reduction of hydrogen ( $\text{H}_2$ -TPR) were recorded on a fixed-bed reactor at temperature range from 200 °C to 700 °C. Firstly, 50 mg of catalyst was pre-treated at 400 °C for 1h by using the flow of 5 vol%  $\text{O}_2$  in argon (Ar) to eliminate some physisorbed species on the surface of sample so as to keep the same conditions. After that, the obtained material were cooled to 200 °C within the ultra-pure argon (Ar) flow. Subsequently,  $\text{H}_2$ -TPR test was performed under the 10%  $\text{H}_2$ /Ar (30  $\text{cm}^3/\text{min}$ ) with the heating rate of 10 °C/min from 200 °C to 700 °C, and hydrogen ( $\text{H}_2$ ) consumption during the reduction reaction process was monitored by an on-line thermal conductivity detector (TCD).

Base properties of catalyst samples were characterized by  $\text{CO}_2$ -TPD, in which a TCD was used to on-line detect the concentration of the desorbed carbon dioxide ( $\text{CO}_2$ ). Before  $\text{CO}_2$ -TPD experiment, the catalyst (100 mg) was treated with helium (He, 30  $\text{cm}^3/\text{min}$ ) flow at 500 °C for 2 h, then the obtained catalyst was cooled to room temperature. After that, the catalyst was saturated by 10%  $\text{CO}_2$  within He (30  $\text{cm}^3/\text{min}$ ) under room temperature. Then, the saturated catalyst were purified at 100 °C with ultra-pure helium (He) gas for 1 h to remove weak  $\text{CO}_2$  and/or physically adsorbed  $\text{CO}_2$ .  $\text{CO}_2$ -TPD profile was recorded by heating cell temperature from 100 to 800 °C in ramp rate of 10 °C/min within ultra-pure He (30  $\text{cm}^3/\text{min}$ ).  $\text{O}_2$ -TPD were tested by similar experimental method on the same apparatus equipped with TCD. The catalysts (100 mg) were first treated at 450 °C for 1h in He flow (30  $\text{cm}^3/\text{min}$ ) and cooled to room temperature in the same atmosphere, then  $\text{O}_2$  (oxygen) flow was continuously pass at 30  $\text{cm}^3/\text{min}$  though materials for 1h. Then the saturated sample were swept using flowing He.  $\text{O}_2$ -TPD profile was carried out at a heating rate of 10 °C/min from 30 to 800 °C in flowing He.

### 2.3 Catalytic activity test

The catalytic activity tests for CH<sub>3</sub>SH decomposition was measured in a fixed-bed micro-reactor under atmospheric pressure at temperature region between 250 °C and 500 °C. 0.2g of catalyst with 60-40 mesh size was placed in the reactor. Then, the reactant gas mixture (1% CH<sub>3</sub>SH balanced with N<sub>2</sub>) in total flow 30 cm<sup>3</sup>/min was introduced to the reaction system. The outlet gas from the reactor was analyzed by employing two sets of on-line GC equipped with a flame photometric detector (FPD), a thermal conductivity detector (TCD), two flame ionization detectors (FID) together with one methanation reactor.

The conversion of CH<sub>3</sub>SH (%) is defined as:

$$CH_3SH \text{ conversion} = \frac{C_{(CH_3SH)in} - C_{(CH_3SH)out}}{C_{(CH_3SH)in}} \times 100\%$$

C<sub>(CH<sub>3</sub>SH)in</sub> represents the CH<sub>3</sub>SH initial concentration, and C<sub>(CH<sub>3</sub>SH)out</sub> denotes the CH<sub>3</sub>SH residual concentration after reaction.

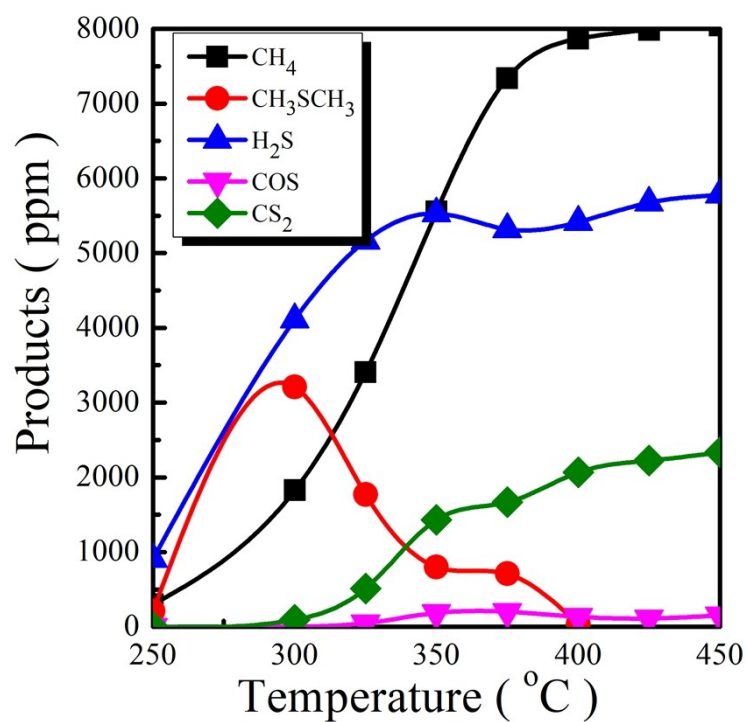

**Figure S1.** Decomposition products as a function of reaction temperature on Cr-N/MCM-41.

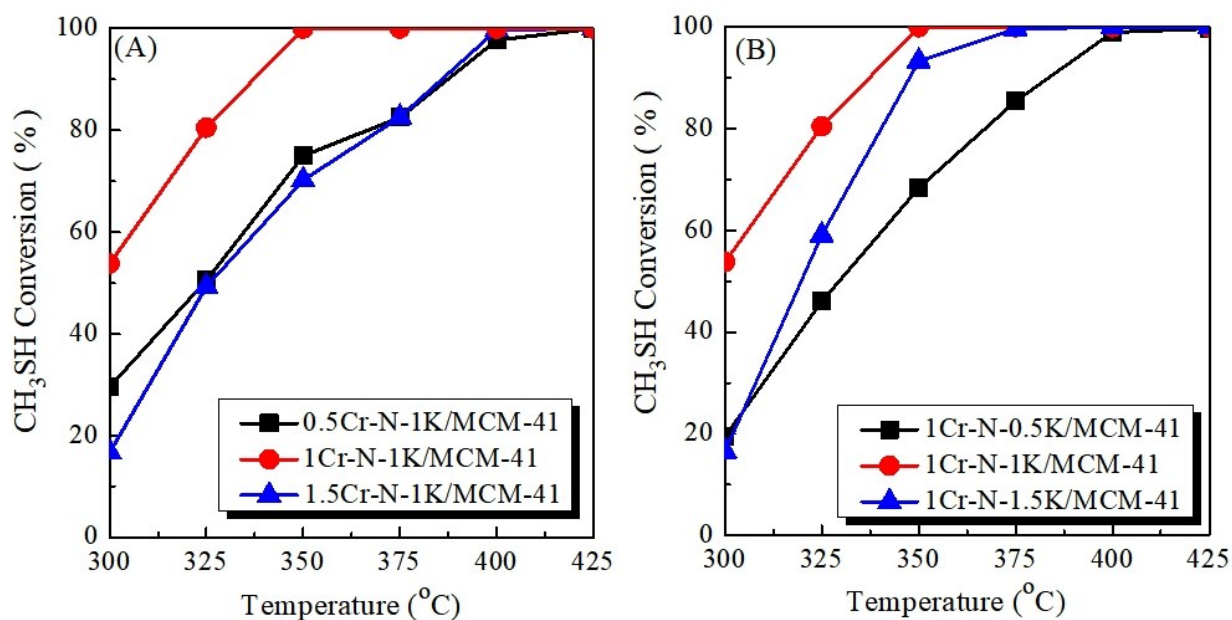

**Figure S2.** Conversion of CH<sub>3</sub>SH as a function of reaction temperature on different Cr to K molar ratio of Cr-N-K/MCM-41 catalysts

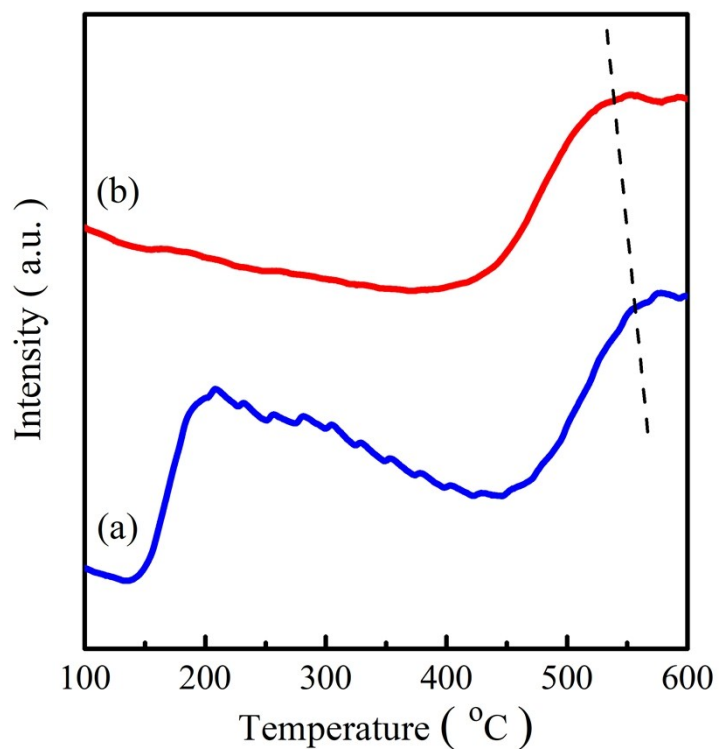

**Figure S3.** NH<sub>3</sub>-TPD profiles of (a) Cr-N/MCM-41 and (b) Cr-N-K/MCM-41 catalysts.

With the addition of K, the intensity of weak acid sites decreased and the temperature of strong acid peak shift to the lower temperature. This phenomenon proves that alkali metal potassium significantly reduces the acidity of Cr-N/MCM-41 sample, which is beneficial to the catalytic conversion CH<sub>3</sub>SH

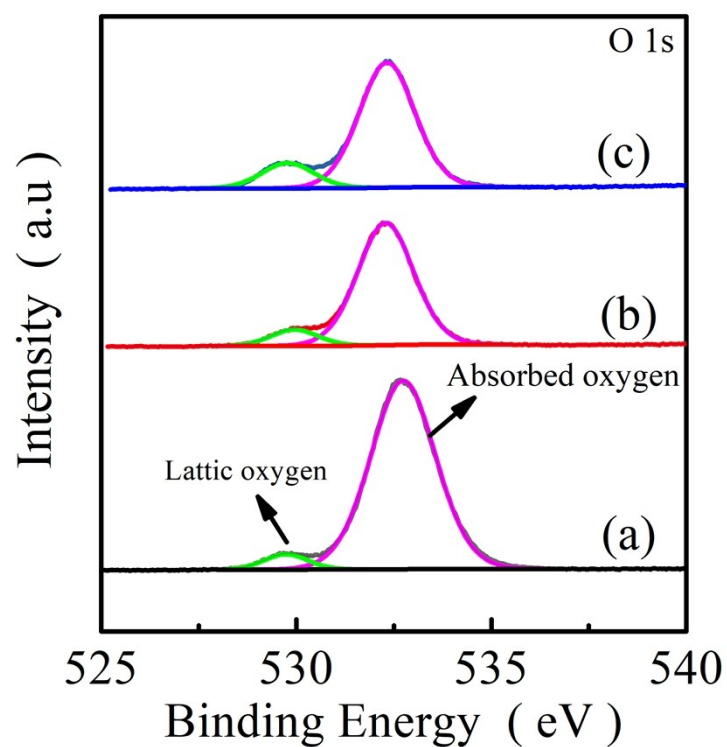

**Figure S4.** XPS of O 1s of (a) Cr-N/MCM-41, (b) Cr-K/MCM-41 and (c) Cr-N-K/MCM-41.

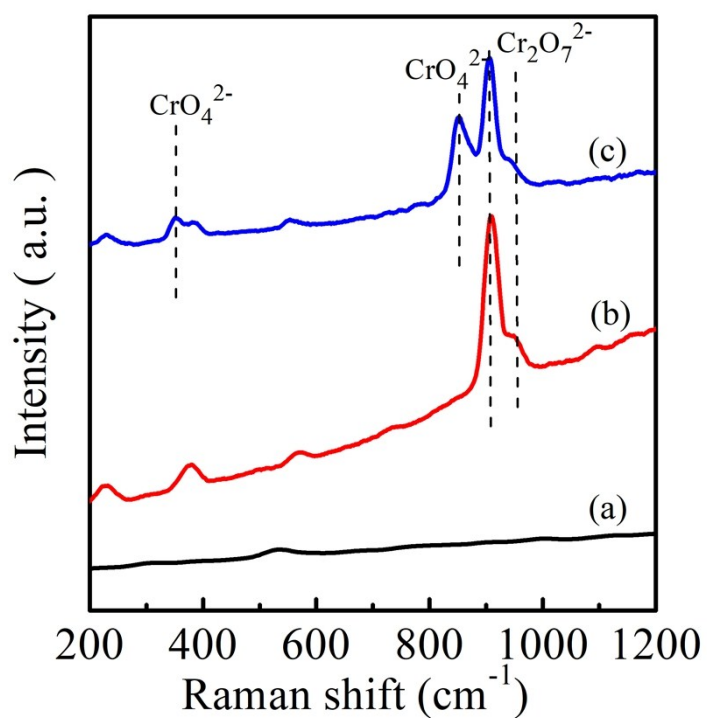

**Figure S5.** Raman spectra of (a) Cr-N/MCM-41, (b) Cr-K/MCM-41 and (c) Cr-N-K/MCM-41.

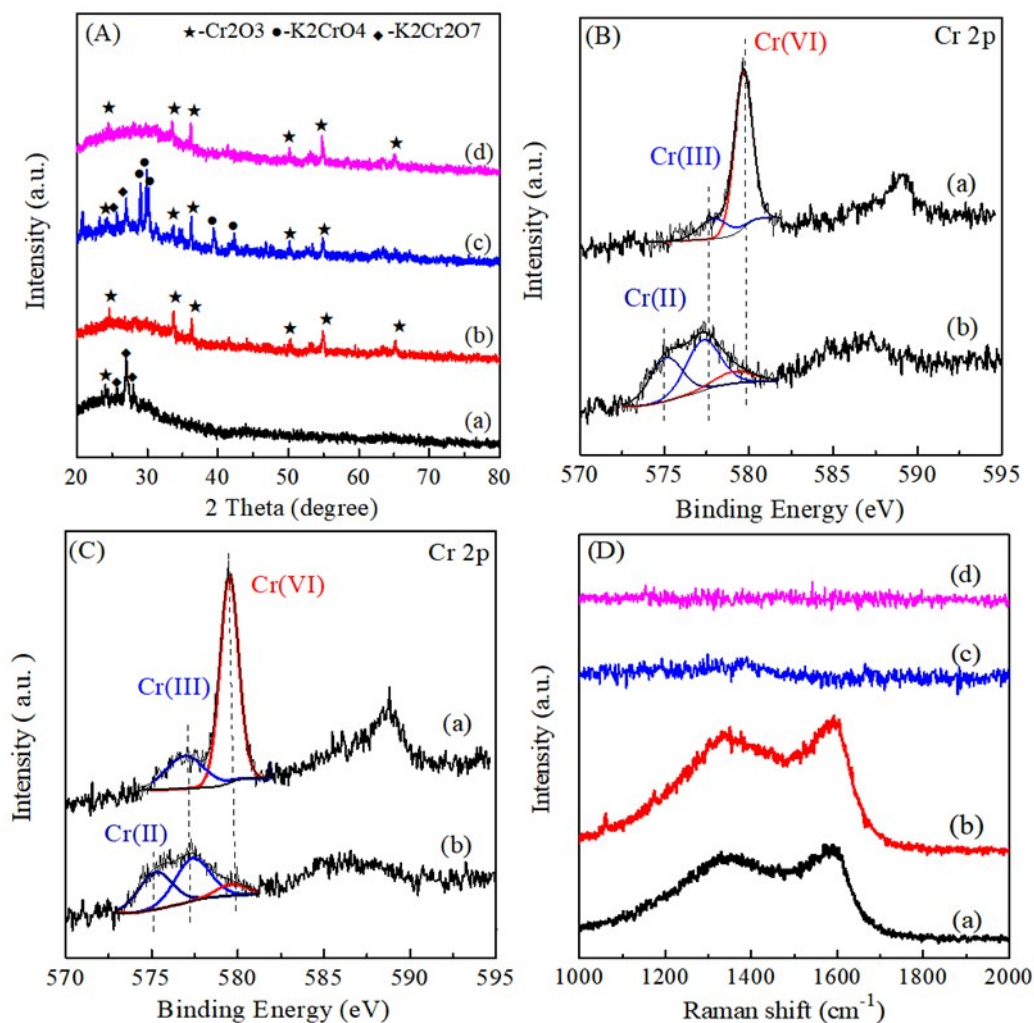

**Figure S6.** (A) XRD patterns of K-containing catalysts: (a) Fresh Cr-K/MCM-41; (b) Spent Cr-K/MCM-41; (c) Fresh Cr-N-K/MCM-41; (d) Spent Cr-N-K/MCM-41. (B) XPS spectra of fresh (a) and spent (b) Cr-K/MCM-41 catalyst. (C) XPS spectra of fresh (a) and spent (b) Cr-N-K/MCM-41 catalyst. (D) Raman spectra of spent and regenerated catalysts: (a) Spent Cr-K/MCM-41; (b) Spent Cr-N-K/MCM-41; (c) Regenerated Cr-K/MCM-41; (d) Regenerated Cr-N-K/MCM-41.

**Table S1** ICP-OES results on different Cr to K molar ratio of Cr-N-K/MCM-41 samples.

| Sample            | Cr/K | ICP-OES       |                |            |
|-------------------|------|---------------|----------------|------------|
|                   |      | K content (%) | Cr content (%) | Cr/K (ICP) |
| 0.5Cr-N-1K/MCM-41 | 0.5  | 11.9          | 6.4            | 0.54       |
| 1Cr-N-1K/MCM-41   | 1    | 11.9          | 10.7           | 0.90       |
| 1.5Cr-N-1K/MCM-41 | 1.5  | 11.9          | 14.1           | 1.18       |

**Table S2** ICP-OES results on different K to Cr molar ratio of Cr-N-K/MCM-41 samples.

| Sample            | K/Cr | ICP-OES       |                |            |
|-------------------|------|---------------|----------------|------------|
|                   |      | K content (%) | Cr content (%) | Cr/K (ICP) |
| 1Cr-N-0.5K/MCM-41 | 0.5  | 6.08          | 10.5           | 0.58       |
| 1Cr-N-1K/MCM-41   | 1    | 11.9          | 10.7           | 1.11       |
| 1Cr-N-1.5K/MCM-41 | 1.5  | 17.3          | 10.1           | 1.71       |

**Table S3** Catalytic activity comparison of K-containing with other reported catalyst

| Catalyst                                            | Temperature(°C) <sup>a</sup> | Refs. |
|-----------------------------------------------------|------------------------------|-------|
| CeO <sub>2</sub>                                    | 450                          | [1]   |
| Ce <sub>0.75</sub> Y <sub>0.25</sub> O <sub>2</sub> | 450                          | [2]   |



|                     |     |              |
|---------------------|-----|--------------|
| HZSM-5              | 550 | [3]          |
| Cr/ZSM-5            | 450 | [4]          |
| Nd/ZSM-5            | 500 | [5]          |
| Sm/ZSM-5            | 500 | [6]          |
| La/ZSM-5            | 500 | [3]          |
| Reused Cr adsorbent | 400 | [7]          |
| Cr-N/MCM-41         | 450 | Present work |
| Cr-K/MCM-41         | 375 | Present work |
| Cr-N-K/MCM-41       | 350 | Present work |

**Table S4** Thermodynamic data ( $\Delta H$ ,  $S$ ,  $G$ ,  $K_p$  and  $\text{Log}_{10}(K_p)$ ) of equation (1) obtained from HSC Chemistry software under various temperature.

| Reactions                 | <b><math>4(\text{NH}_4)_2\text{CrO}_4 = 2\text{CrO}_3 + \text{Cr}_2\text{O}_3 + \text{N}_2 (\text{g}) + 6\text{NH}_3 (\text{g}) + 7\text{H}_2\text{O} (\text{g}) \quad (1)</math></b> |                 |                 |                  |                  |                  |                  |                  |                  |                  |                  |                  |                  |                  |                  |
|---------------------------|---------------------------------------------------------------------------------------------------------------------------------------------------------------------------------------|-----------------|-----------------|------------------|------------------|------------------|------------------|------------------|------------------|------------------|------------------|------------------|------------------|------------------|------------------|
|                           | 0 °C                                                                                                                                                                                  | 50 °C           | 100 °C          | 150 °C           | 200 °C           | 250 °C           | 300 °C           | 350 °C           | 400 °C           | 450 °C           | 500 °C           | 550 °C           | 600 °C           | 650 °C           | 700 °C           |
| $\Delta H_r(T)$ (kJ/mol)  | 111.4<br>15                                                                                                                                                                           | 120.8<br>45     | 130.6<br>38     | 140.7<br>35      | 158.3<br>09      | 169.3<br>14      | 180.5<br>15      | 191.8<br>94      | 203.4<br>53      | 215.1<br>93      | 227.1<br>13      | 239.2<br>10      | 251.4<br>83      | 263.9<br>29      | 276.5<br>48      |
| $\Delta S_r(T)$ (J/K/mol) | 535.4<br>33                                                                                                                                                                           | 567.1<br>03     | 595.2<br>73     | 620.6<br>57      | 659.1<br>49      | 681.2<br>55      | 701.7<br>01      | 720.7<br>34      | 738.5<br>75      | 755.3<br>97      | 771.3<br>34      | 786.4<br>94      | 800.9<br>67      | 814.8<br>28      | 828.1<br>39      |
| $\Delta G_r(T)$ (kJ/mol)  | -<br>34.83<br>9                                                                                                                                                                       | -<br>62.41<br>5 | -<br>91.48<br>8 | -<br>121.8<br>96 | -<br>153.5<br>67 | -<br>187.0<br>85 | -<br>221.6<br>65 | -<br>257.2<br>31 | -<br>293.7<br>19 | -<br>331.0<br>72 | -<br>369.2<br>44 | -<br>408.1<br>92 | -<br>447.8<br>82 | -<br>488.2<br>79 | -<br>529.3<br>55 |
| $K_p$                     | 4.601<br>E+006                                                                                                                                                                        | 1.229<br>E+010  | 6.424<br>E+012  | 1.118<br>E+015   | 9.013<br>E+016   | 4.801<br>E+018   | 1.597<br>E+020   | 3.663<br>E+021   | 6.218<br>E+022   | 8.242<br>E+023   | 8.881<br>E+024   | 8.032<br>E+025   | 6.251<br>E+026   | 4.272<br>E+027   | 2.606<br>E+028   |
| $\text{Log}_{10}(K_p)$    | 6.663                                                                                                                                                                                 | 10.09<br>0      | 12.80<br>8      | 15.04<br>8       | 16.95<br>5       | 18.68<br>1       | 20.20<br>3       | 21.56<br>4       | 22.79<br>4       | 23.91<br>6       | 24.94<br>8       | 25.90<br>5       | 26.79<br>6       | 27.63<br>1       | 28.41<br>6       |

**Table S5** Thermodynamic data ( $\Delta H$ ,  $S$ ,  $G$ ,  $K_p$  and  $\text{Log}_{10}(K_p)$ ) of equation (2) obtained from HSC Chemistry software under various temperature.

| Reactions                        | <b><math>2\text{K}_2\text{Cr}_2\text{O}_7 = 2\text{K}_2\text{O} + 2\text{Cr}_2\text{O}_3 + 3\text{O}_2(\text{g})</math> (2)</b> |            |            |            |            |            |            |            |            |            |            |            |            |            |            |
|----------------------------------|---------------------------------------------------------------------------------------------------------------------------------|------------|------------|------------|------------|------------|------------|------------|------------|------------|------------|------------|------------|------------|------------|
|                                  | 0 °C                                                                                                                            | 50 °C      | 100 °C     | 150 °C     | 200 °C     | 250 °C     | 300 °C     | 350 °C     | 400 °C     | 450 °C     | 500 °C     | 550 °C     | 600 °C     | 650 °C     | 700 °C     |
| $\Delta H_r(\text{T})$ (kJ/mol)  | 527.9                                                                                                                           | 539.6      | 551.4      | 563.2      | 575.4      | 587.9      | 600.7      | 614.7      | 632.2      | 645.8      | 659.5      | 673.3      | 687.1      | 700.9      | 714.8      |
|                                  | 71                                                                                                                              | 12         | 14         | 66         | 13         | 26         | 70         | 75         | 95         | 97         | 73         | 16         | 20         | 81         | 96         |
| $\Delta S_r(\text{T})$ (J/K/mol) | 174.1                                                                                                                           | 213.2      | 247.2      | 277.0      | 304.1      | 329.2      | 352.7      | 376.1      | 403.2      | 422.7      | 440.9      | 458.2      | 474.4      | 489.9      | 504.6      |
|                                  | 78                                                                                                                              | 46         | 09         | 08         | 36         | 69         | 13         | 48         | 19         | 10         | 96         | 19         | 99         | 36         | 15         |
| $\Delta G_r(\text{T})$ (kJ/mol)  | 480.3                                                                                                                           | 470.7      | 459.1      | 446.0      | 431.5      | 415.6      | 398.6      | 380.3      | 360.8      | 340.2      | 318.6      | 296.1      | 272.8      | 248.6      | 223.8      |
|                                  | 95                                                                                                                              | 02         | 68         | 50         | 12         | 69         | 13         | 78         | 68         | 15         | 17         | 33         | 11         | 97         | 30         |
| $K_p$                            | 1.337E-092                                                                                                                      | 8.099E-077 | 5.235E-065 | 8.590E-056 | 2.281E-048 | 3.115E-042 | 4.666E-037 | 1.296E-032 | 9.891E-029 | 2.652E-025 | 2.966E-022 | 1.610E-019 | 4.767E-017 | 8.449E-015 | 9.655E-013 |
|                                  |                                                                                                                                 |            |            |            |            |            |            |            |            |            |            |            |            |            |            |
| $\text{Log}_{10}(K_p)$           | -91.87                                                                                                                          | -76.09     | -64.28     | -55.06     | -47.64     | -41.50     | -36.33     | -31.88     | -28.00     | -24.57     | -21.52     | -18.79     | -16.32     | -14.07     | -12.01     |
|                                  | 4                                                                                                                               | 2          | 1          | 6          | 2          | 7          | 1          | 7          | 5          | 6          | 8          | 3          | 2          | 3          | 5          |

**Table S6** Thermodynamic data ( $\Delta H$ ,  $S$ ,  $G$ ,  $K_p$  and  $\text{Log}_{10}(K_p)$ ) of equation (3) obtained from HSC Chemistry software under various temperature.

| Reactions                 | $2 \text{Cr}_2\text{O}_3 + 4\text{K}_2\text{CO}_3 + 3\text{O}_2 (\text{g}) = 4\text{K}_2\text{CrO}_4 + 4\text{CO}_2 (\text{g}) \quad (3)$ |       |        |        |        |        |        |        |        |        |        |        |        |        |        |
|---------------------------|-------------------------------------------------------------------------------------------------------------------------------------------|-------|--------|--------|--------|--------|--------|--------|--------|--------|--------|--------|--------|--------|--------|
|                           | 0 °C                                                                                                                                      | 50 °C | 100 °C | 150 °C | 200 °C | 250 °C | 300 °C | 350 °C | 400 °C | 450 °C | 500 °C | 550 °C | 600 °C | 650 °C | 700 °C |
| $\Delta H_r(T)$ (kJ/mol)  | -                                                                                                                                         | -     | -      | -      | -      | -      | -      | -      | -      | -      | -      | -      | -      | -      | -      |
|                           | 156.2                                                                                                                                     | 157.4 | 158.4  | 159.4  | 160.7  | 162.3  | 164.3  | 166.6  | 169.2  | 174.9  | 175.4  | 175.7  | 175.6  | 175.2  | 156.4  |
|                           | 46                                                                                                                                        | 44    | 86     | 63     | 20     | 66     | 79     | 69     | 21     | 49     | 92     | 47     | 68     | 09     | 59     |
| $\Delta S_r(T)$ (J/K/mol) | 129.5                                                                                                                                     | 125.5 | 122.5  | 120.0  | 117.2  | 113.9  | 110.2  | 106.4  | 102.5  | 94.25  | 93.53  | 93.20  | 93.30  | 93.80  | 113.8  |
|                           | 13                                                                                                                                        | 32    | 20     | 68     | 69     | 68     | 97     | 69     | 33     | 8      | 0      | 9      | 0      | 9      | 48     |
| $\Delta G_r(T)$ (kJ/mol)  | -                                                                                                                                         | -     | -      | -      | -      | -      | -      | -      | -      | -      | -      | -      | -      | -      | -      |
|                           | 191.6                                                                                                                                     | 198.0 | 204.2  | 210.2  | 216.2  | 221.9  | 227.5  | 233.0  | 238.2  | 243.1  | 247.8  | 252.4  | 257.1  | 261.8  | 267.2  |
|                           | 22                                                                                                                                        | 09    | 05     | 70     | 05     | 88     | 96     | 15     | 41     | 12     | 05     | 72     | 33     | 09     | 50     |
| $K_p$                     | 4.437                                                                                                                                     | 1.022 | 3.869  | 9.086  | 7.422  | 1.467  | 5.545  | 3.418  | 3.079  | 3.647  | 5.537  | 1.053  | 2.420  | 6.534  | 2.218  |
|                           | E+036                                                                                                                                     | E+032 | E+028  | E+025  | E+023  | E+022  | E+020  | E+019  | E+018  | E+017  | E+016  | E+016  | E+015  | E+014  | E+014  |
| $\text{Log}_{10}(K_p)$    | 36.64                                                                                                                                     | 32.00 | 28.58  | 25.95  | 23.87  | 22.16  | 20.74  | 19.53  | 18.48  | 17.56  | 16.74  | 16.02  | 15.38  | 14.81  | 14.34  |
|                           | 7                                                                                                                                         | 9     | 8      | 8      | 1      | 7      | 4      | 4      | 8      | 2      | 3      | 2      | 4      | 5      | 6      |

**Table S7** Thermodynamic data ( $\Delta H$ ,  $S$ ,  $G$ ,  $K_p$  and  $\text{Log}_{10}(K_p)$ ) of equation (4) obtained from HSC Chemistry software under various temperature.

| Reactions                 | <b><math>4\text{K}_2\text{CrO}_4 + 2 \text{Cr}_2\text{O}_3 + 3\text{O}_2 (\text{g}) = 4\text{K}_2\text{Cr}_2\text{O}_7</math> (4)</b> |             |             |             |             |             |             |             |             |             |             |             |             |             |             |
|---------------------------|---------------------------------------------------------------------------------------------------------------------------------------|-------------|-------------|-------------|-------------|-------------|-------------|-------------|-------------|-------------|-------------|-------------|-------------|-------------|-------------|
|                           | 0 °C                                                                                                                                  | 50 °C       | 100 °C      | 150 °C      | 200 °C      | 250 °C      | 300 °C      | 350 °C      | 400 °C      | 450 °C      | 500 °C      | 550 °C      | 600 °C      | 650 °C      | 700 °C      |
| $\Delta H_r(T)$ (kJ/mol)  | -                                                                                                                                     | -           | -           | -           | -           | -           | -           | -           | -           | -           | -           | -           | -           | -           | -           |
|                           | 53.43                                                                                                                                 | 64.74       | 76.38       | 88.23       | 100.3       | 112.8       | 125.5       | 138.5       | 151.8       | 165.4       | 179.3       | 193.5       | 208.1       | 223.1       | 247.4       |
|                           | 4                                                                                                                                     | 0           | 9           | 9           | 75          | 21          | 59          | 61          | 43          | 26          | 27          | 66          | 64          | 44          | 58          |
| $\Delta S_r(T)$ (J/K/mol) | -                                                                                                                                     | -           | -           | -           | -           | -           | -           | -           | -           | -           | -           | -           | -           | -           | -           |
|                           | 84.24                                                                                                                                 | 122.2       | 155.7       | 185.5       | 212.6       | 237.6       | 260.8       | 282.6       | 303.1       | 322.5       | 341.1       | 359.0       | 376.2       | 392.8       | 418.6       |
|                           | 7                                                                                                                                     | 08          | 20          | 15          | 18          | 17          | 68          | 14          | 14          | 76          | 61          | 04          | 19          | 99          | 77          |
| $\Delta G_r(T)$ (kJ/mol)  | -                                                                                                                                     | -           | -           | -9.738      | 0.225       | 11.48       | 23.95       | 37.55       | 52.19       | 67.84       | 84.44       | 101.9       | 120.3       | 139.5       | 159.9       |
|                           | 30.42                                                                                                                                 | 25.24       | 18.28       |             |             | 9           | 8           | 0           | 8           | 4           | 1           | 48          | 31          | 61          | 78          |
|                           | 2                                                                                                                                     | 9           | 2           |             |             |             |             |             |             |             |             |             |             |             |             |
| $K_p$                     | <b>6.57</b>                                                                                                                           | <b>1.20</b> | <b>3.62</b> | <b>1.59</b> | <b>9.44</b> | <b>7.12</b> | <b>6.55</b> | <b>7.11</b> | <b>8.89</b> | <b>1.25</b> | <b>1.97</b> | <b>3.38</b> | <b>6.32</b> | <b>1.26</b> | <b>2.58</b> |
|                           | <b>8E+</b>                                                                                                                            | <b>7E+</b>  | <b>6E+</b>  | <b>3E+</b>  | <b>4E-</b>  | <b>5E-</b>  | <b>3E-</b>  | <b>4E-</b>  | <b>6E-</b>  | <b>6E-</b>  | <b>1E-</b>  | <b>9E-</b>  | <b>1E-</b>  | <b>6E-</b>  | <b>4E-</b>  |
|                           | <b>005</b>                                                                                                                            | <b>004</b>  | <b>002</b>  | <b>001</b>  | <b>001</b>  | <b>002</b>  | <b>003</b>  | <b>004</b>  | <b>005</b>  | <b>005</b>  | <b>006</b>  | <b>007</b>  | <b>008</b>  | <b>008</b>  | <b>009</b>  |
| $\text{Log}_{10}(K_p)$    | 5.818                                                                                                                                 | 4.082       | 2.559       | 1.202       | -0.025      | -1.147      | -2.184      | -3.148      | -4.051      | -4.901      | -5.705      | -6.470      | -7.199      | -7.897      | -8.588      |

## References

- [1] D. He, G. Wan, H. Hao, D. Chen, J. Lu, L. Zhang, F. Liu, L. Zhong, S. He, Y. Luo, Chem. Eng. J., 2016, 289, 161-169.
- [2] D. Chen, D. Zhang, D. He, J. Lu, L. Zhong, C. Han, Y. Luo, Chin. J. Catal, 2018, 39:1929-1941.
- [3] J. Lu, H. Hao, L. Zhang, Z. Xu, L. Zhong, Y. Zhao, D. He, J. Liu, D. Chen, H. Pu, S. He, Y. Luo, Appl. Catal. B, 2018, 237, 185-197.
- [4] D. He, J. Yu, Y. Mei, J. Liu, Y. Zhao, S. Yang, X. Cao, S. He, Y. Luo, Catal. Commun., 2018, 112, 31-34.
- [5] D. He, H. Hao, D. Chen, J. Liu, J. Yu, J. Lu, F. Liu, S. He, K. Li, Y. Luo, Appl. Catal. A Gen., 2017, 533, 66-74.
- [6] D. He, D. Chen, H. Hao, J. Yu, J. Liu, J. Lu, G. Wan, S. He, K. Li, Y. Luo, Chem. Eng. J., 2017, 317, 60-69.
- [7] D. He, L. Zhang, Y. Zhao, Y. Mei, D. Chen, S. He, Y. Luo, Environ. Sci. Technol, 2018, 52, 3669-3675.
